# Supplementary material
Source: PubMed Central journal article supplement (PMC2863791)
Supplement: supp_84_9_4124__1.pdf [file supp_84_9_4124__1.pdf]

Supplemental Table 1

| Plasmid                              | Forward Primer<br>5' → 3'                                                                        | Reverse Primer<br>5' → 3'                                                                   |
|--------------------------------------|--------------------------------------------------------------------------------------------------|---------------------------------------------------------------------------------------------|
| N-XhoI/pSG130B/S                     | ACGGCAGCCGCTCGAGGCGGTC<br>ATGGCG                                                                 | CGCCATGACCGCCTCGAGCGGCTG<br>CCGT                                                            |
| N-Venus <sup>a.a.1-154</sup> /ICP27* | GCGCTCGAGATGGTGAGCAAGG<br>GC                                                                     | GCGCTCGAGTGGTGGCGATGGATCT<br>GGCGGTG<br>ATATAGACGTTGTG                                      |
| ICP27/C-Venus <sup>a.a.155+</sup> *  | GCGAATTCCGTCCGGCGTGCAA<br>AATCCCG<br>AACGACCTGAAACAGAAAGTCAT<br>GAACCA<br>CGACAAGCAGAAGAACGGCATC | CGCGAATTCTTACTTGTACAGCTCGT<br>C CATGCC                                                      |
| N-Venus <sup>a.a.155+</sup> /ICP27*  | CGCTCGAGATGGACAAGCAGAA<br>GAACGGC                                                                | CGCTCGAGGTGGTTCATGACTTTCT<br>GT<br>TTCAGGTCGTTCCGGGATTTTGCACG<br>CC GGACGCTTGTACAGCTCGTCCAT |
| ICP27C-Venus <sup>a.a.1-154</sup> *  | CGGAATTCAGATCCATCGCCAC<br>CATGGTGA<br>GCAAGGGCGAG                                                | CGGAATTCTTAGGCGGTGATATAGA<br>CGTTGTG                                                        |
| ICP27/C-YFP                          | CGCGAATTCTACCGGTCGCCAC<br>CATGG                                                                  | CGCGAATTCTTACTTGTACAGCTCGT<br>CCATGCC                                                       |
| N-CFP/ICP27                          | CGCGAATTCCTACCGGTCGCCA<br>CCATG                                                                  | CGCGAATTCCTTGTACAGCTCGTCC<br>AT                                                             |

\*Linker sequences are  
in blue
