# Supplementary material
Source: PubMed Central journal article supplement (PMC2863791)
Supplement: supp_84_9_4124__2.pdf [file supp_84_9_4124__2.pdf]

## Supplemental Table 2

### Competition Experiment

| <b>4 h post-infection</b> | <b>27LacZ</b> | <b>KOS</b>  |
|---------------------------|---------------|-------------|
| 1                         | 26            | 35          |
| 2                         | 44            | 34          |
| 3                         | 42            | 34          |
| 4                         | 27            | 27          |
| 5                         | 30            | 33          |
| <b>Average</b>            | <b>33.8</b>   | <b>32.6</b> |
|                           |               |             |
| <b>8 h post-infection</b> | <b>27LacZ</b> | <b>KOS</b>  |
| 1                         | 51            | 46          |
| 2                         | 43            | 35          |
| 3                         | 35            | 37          |
| 4                         | 44            | 45          |
| 5                         | 36            | 36          |
| <b>Average</b>            | <b>41.8</b>   | <b>39.8</b> |
